# Supplementary material for: Dynamic DNA methylation changes reveal tissue-specific gene expression in sugarcane
Source: Front Plant Sci. 2022 Oct 13;13:1036764. doi: 10.3389/fpls.2022.1036764 (PMC9606695; doi:10.3389/fpls.2022.1036764)
Supplement: Supplementary file 2 [file Table_1.xlsx]

## Sheet: Table S1
Table S1 Summary of mapping results of BS-seq libraries
sample	total pairs	aligned pairs		unpaired read		mapping ratio(%)	Conversion rate(%)	coverage
		unique mapping pairs	multi-mapping pairs	uniq_reads	multi read
Leaf1	119129215	35299171	23537707	23269418	27624136	70.75	99.3	12.32
Leaf2	160476727	48714553	33474234	29619988	34574097	71.22	99.38	16.6
Root1	183354942	54625219	35618796	35360990	41481184	70.17	99.25	18.97
Root2	162862183	36996105	23356350	25415661	29377634	53.88	97.82	16.85
Rind1	145986271	45567076	30591197	28487839	32915766	73.2	99.03	15.1
Rind2	177445756	48696514	32855773	38280907	47771543	70.21	99.22	18.36
Pith1	175617713	50847355	35527782	34584319	42088979	71.01	99.11	18.17
Pith2	107548493	29867450	21200132	21582968	26966678	70.05	99.02	11.13
