# Supplementary material for: Dynamic DNA methylation changes reveal tissue-specific gene expression in sugarcane
Source: Front Plant Sci. 2022 Oct 13;13:1036764. doi: 10.3389/fpls.2022.1036764 (PMC9606695; doi:10.3389/fpls.2022.1036764)
Supplement: Supplementary file 3 [file Table_2.xlsx]

## Sheet: Table S2
Table S2 DNA methylation and demethylation pathway gene
type	name	Arabidopsis	Surgarcane	remarks
DNA methylation	MET	AT4G13610	Sspon.01G0048600-2C	DOI： 10.13592/j.cnki.ppj.400003
		AT4G08990	Sspon.01G0048600-3D
		AT4G14140	Sspon.02G0023350-1A
		AT5G49160	Sspon.02G0023350-1P
	CMT3	AT1G69770	Sspon.01G0015710-1A
			Sspon.01G0015710-1P
			Sspon.01G0015710-2B
			Sspon.01G0015710-3D
	DRM1	AT5G15380	Sspon.01G0035980-2D
	DRM2	AT3G17310	Sspon.01G0000660-1A
			Sspon.01G0000660-1P
			Sspon.01G0000660-2B
			Sspon.01G0000660-3C
			Sspon.03G0016990-3C
			Sspon.03G0016990-2B
			Sspon.03G0016990-4D
			Sspon.03G0016990-1P
			Sspon.03G0016990-1A
	DRM3	AT5G14620	Sspon.07G0033000-1C
			Sspon.07G0014070-1P
			Sspon.07G0014070-4D
			Sspon.07G0014070-2B
			Sspon.07G0014070-3C
			Sspon.07G0014070-1A
	CMT2	AT4G19020	Sspon.07G0025270-2C
			Sspon.07G0025270-3D
			Sspon.07G0025280-1B
	RDR2_RDR6	AT1G14790	Sspon.05G0009620-1A	DOI: 10.1038/s41598-020-70061-7
		AT4G11130	Sspon.08G0019290-1B
		AT3G49500	Sspon.05G0009620-2B
		AT2G05370	Sspon.08G0019290-2D
			Sspon.05G0009620-3C
			Sspon.05G0009620-4D
	DCL	AT5G45150	Sspon.01G0001230-3D
		AT5G20320	Sspon.01G0001230-1A
		AT3G20420	Sspon.01G0022370-1A
		AT4G15417
		AT3G03300
		AT1G01040
		AT3G43920	Sspon.01G0019860-4D
	AGO4	AT2G27040	Sspon.02G0016200-2D
	AGO6	AT2G32940	Sspon.07G0020900-1A
			Sspon.07G0020900-2D
	NRPD	AT4G35800	Sspon.06G0011120-2B
		AT3G57660	Sspon.06G0011120-1T
		AT5G60040	Sspon.06G0011120-1P
		AT1G63020	Sspon.06G0011120-1A
			Sspon.05G0024880-1B
			Sspon.05G0031690-2D
			Sspon.05G0031690-1C
	NRPE	AT2G40030	Sspon.04G0018230-1A	The related sequences in Arabidopsis were used as query, and blast was used to identify the DNA methylation related genes in sugarcane. Only the genes consistent with the domain in Arabidopsis were retained
			Sspon.04G0018230-2B
			Sspon.04G0018230-3C
			Sspon.04G0018230-4D
			Sspon.04G0018230-1T
			Sspon.01G0016260-1A
			Sspon.01G0016250-1A
			Sspon.01G0016250-3C
	DDM	AT2G25170	Sspon.08G0012870-1A
		AT1G03750	Sspon.01G0039360-1P
		AT3G06010	Sspon.03G0002020-3C
		AT5G44800	Sspon.08G0012870-2B
		AT1G08060	Sspon.02G0007200-1A
		AT2G44980	Sspon.02G0024850-4D
		AT4G31900	Sspon.03G0002010-1A
		AT5G19310	Sspon.02G0002020-1A
		AT2G13370	Sspon.08G0021620-1B
		AT2G28240	Sspon.02G0024850-2B
		AT2G28290	Sspon.02G0024850-1A
		AT5G66750	Sspon.02G0024850-3C
		AT2G02090
		AT3G12810
		AT2G46020
		AT2G18760
		AT3G19210
		AT5G63950
		AT5G18620
		AT3G06400
		AT1G08600
DNA demethylation	DME	At5G04560	Sspon.04G0026000-1B
			Sspon.04G0026000-2C
			Sspon.04G0026000-1P
			Sspon.07G0033760-1C
			Sspon.07G0033760-2D
	ROS	At2G36490	Sspon.01G0022040-1A
			Sspon.01G0022040-1P
			Sspon.01G0022040-2D
			Sspon.04G0012050-1A
			Sspon.04G0012050-2B
			Sspon.04G0025980-1B
			Sspon.07G0037700-1D
	DML2	At3G10010	Sspon.05G0037200-1D
			Sspon.05G0037200-1P
	DML3	At4G34060	Sspon.08G0021820-1B
			Sspon.08G0021820-3D
			Sspon.08G0021820-1P
