# Supplementary material for: Dynamic DNA methylation changes reveal tissue-specific gene expression in sugarcane
Source: Front Plant Sci. 2022 Oct 13;13:1036764. doi: 10.3389/fpls.2022.1036764 (PMC9606695; doi:10.3389/fpls.2022.1036764)
Supplement: Supplementary file 4 [file Table_3.xlsx]

## Sheet: Table S3
Table S3 Summary of mapping results of RNA-seq
sample	total pairs	aligned pairs		mapping ratio(%)	cor
		unique mapping pairs	multi-mapping pairs
Leaf1	22344642	9045667	8411169	78.13	0.96
Leaf2	23412373	9435486	8732993	77.6
Root1	22732428	9155307	8119687	75.99	0.88
Root2	22316591	8726849	7616830	73.24
Rind1	22105904	9112896	7884671	76.89	0.96
Rind2	23388660	9757811	8214832	76.84
Pith1	22826002	9509476	8131766	77.29	0.95
Pith2	23876792	9881261	8633409	77.54
