# Supplementary material for: Dynamic DNA methylation changes reveal tissue-specific gene expression in sugarcane
Source: Front Plant Sci. 2022 Oct 13;13:1036764. doi: 10.3389/fpls.2022.1036764 (PMC9606695; doi:10.3389/fpls.2022.1036764)
Supplement: Supplementary file 5 [file Table_4.xlsx]

## Sheet: Table S4
Table S4 Results from X2 test for the independence of DMRs and DEGs
sample	DMR gene		gene without DMR		p-value	remarks
	DEG	non DEG	DEG	non DEG
Rt vs L	5436	28419	7005	42966	4.07e-16	L: Leaf; Rt: Root; Rd: Rind; P: Pith
Rd vs L	7219	49697	2941	23969	4e-13
P vs L	9641	53982	2610	17593	5.23e-15
Rd vs Rt	4020	50050	1834	27922	5.33e-12
P vs Rt	4829	55979	1517	21501	4.57e-11
P vs Rd	704	33248	874	49000	0.0008618
